# Supplementary material for: The biomechanical characteristics of the strongman atlas stone lift
Source: PeerJ. 2021 Sep 1;9:e12066. doi: 10.7717/peerj.12066 (PMC8418215; doi:10.7717/peerj.12066)
Supplement: Supplemental Information 1 [file peerj-09-12066-s001.xlsx]

## Sheet: Table S1
Descriptive statistics (mean ± SD)
	Stone 1			Stone 2			Stone 3			Stone 4			Mean across reps
	M	F	Group	M	F	Group	M	F	Group	M	F	Group	M	F	Group
Hip
Beg. first pull	66.5 ± 15.5	88.2 ± 16.6	75.8 ± 19.2	64.9 ± 15.7	87.5 ± 15.6	74.6 ± 19.2	63.7 ± 14.4	83.1 ± 17.2	72.3 ± 18.3	59.3 ± 17.5	79.1 ± 24.7	67.6 ± 22.9	63.7 ± 15.8	84.7 ± 18.7	72.7 ± 20.0
Beg. lap	21.6 ± 15.6	33.2 ± 18.2	26.6 ± 17.6	16.4 ± 16.0	26.2 ± 16.5	20.6 ± 16.8	16.2 ± 14.0	31.9 ± 16.8	23.2 ± 17.1	18.8 ± 18.4	35.1 ± 21.0	25.6 ± 20.9	18.3 ± 16.0	31.5 ± 18.1	24.0 ± 18.1
Beg. second pull	39.0 ± 20.2	41.6 ± 22.5	40.1 ± 21.1	38.5 ± 22.5	44.5 ± 24.0	41.1 ± 23.1	37.4 ± 20.7	43.9 ± 23.6	40.3 ± 22.0	34.4 ± 24.0	46.1 ± 24.0	39.3 ± 24.5	37.4 ± 21.7	44.0 ± 23.2	40.2 ± 22.5
Lift completion	5.8 ± 6.3	8.9 ± 16.8	7.1 ± 11.9	5.0 ± 7.0	14.9 ± 17.4	9.2 ± 13.4	-0.3 ± 10.0	14.6 ± 15.5	6.4 ± 14.7	-6.5 ± 12.5	11.4 ± 12.0	1.0 ± 15.1	1.2 ± 10.3	12.5 ± 15.6	6.1 ± 14.0
First pull ROM	47.6 ± 9.9	57.8 ± 13.8	51.9 ± 12.7	54.6 ± 10.5	66.6 ± 11.5	59.8 ± 12.4	58.7 ± 10.9	60.7 ± 10.8	59.6 ± 10.8	59.2 ± 13.5	64.3 ± 19.6	61.4 ± 16.4	54.9 ± 12.1	62.3 ± 14.3	58.1 ± 13.6
Lap ROM	21.9 ± 12.7	18.4 ± 12.2	20.4 ± 12.5	30.4 ± 15.8	23.6 ± 15.5	27.5 ± 15.9	36.2 ± 16.1	25.6 ± 16.4	31.5 ± 16.9	43.3 ± 17.3	32.7 ± 19.9	38.8 ± 19.0	32.6 ± 17.2	24.9 ± 16.6	29.3 ± 17.4
Second pull ROM	45.0 ± 16.5	55.5 ± 28.4	49.5 ± 22.8	44.1 ± 12.6	50.9 ± 29.7	47.0 ± 21.7	47.7 ± 16.6	51.6 ± 23.2	49.4 ± 19.7	58.5 ± 19.9	52.6 ± 27.1	56.0 ± 23.1	48.6 ± 17.3	52.6 ± 26.8	50.3 ± 22.0
Knee
Beg. first pull	51.0 ± 12.3	47.3 ± 13.2	49.5 ± 12.7	48.5 ± 12.8	46.2 ± 13.1	47.6 ± 12.8	44.2 ± 12.1	44.3 ± 12.5	44.3 ± 12.2	42.3 ± 9.8	37.7 ± 14.0	40.6 ± 11.7	46.6 ± 12.2	44.1 ± 13.5	45.6 ± 12.7
Beg. lap	44.5 ± 20.9	37.1 ± 11.0	41.5 ± 17.9	45.3 ± 21.5	33.8 ± 11.8	40.7 ± 19.0	50.6 ± 16.0	40.0 ± 12.7	46.4 ± 15.6	55.4 ± 16.6	47.4 ± 12.8	52.4 ± 15.6	48.9 ± 19.2	39.4 ± 12.8	45.1 ± 17.6
Beg. second pull	72.2 ± 23.1	64.4 ± 17.6	69.1 ± 21.2	73.2 ± 24.3	64.8 ± 18.9	69.8 ± 22.5	74.9 ± 19.5	66.0 ± 15.9	71.3 ± 18.5	71.9 ± 23.0	65.9 ± 15.8	69.6 ± 20.6	73.1 ± 22.3	65.3 ± 16.9	70.0 ± 20.7
Lift completion	6.9 ± 8.2	7.2 ± 7.9	7.0 ± 8.0	8.4 ± 8.6	10.9 ± 12.1	9.4 ± 10.1	8.2 ± 12.5	9.9 ± 11.5	8.9 ± 12.1	8.1 ± 10.9	8.2 ± 6.6	8.1 ± 9.5	7.9 ± 10.1	9.1 ± 9.8	8.4 ± 10.0
First pull ROM	36.4 ± 19.2	36.3 ± 13.5	36.4 ± 17.0	39.9 ± 18.5	36.2 ± 10.7	38.4 ± 15.8	39.0 ± 14.3	37.6 ± 12.6	38.4 ± 13.5	42.1 ± 15.8	41.2 ± 18.6	41.8 ± 16.7	39.3 ± 17.0	37.7 ± 13.9	38.7 ± 15.8
Lap ROM	32.7 ± 19.9	30.2 ± 20.4	31.7 ± 20.0	36.7 ± 19.5	33.1 ± 18.9	35.3 ± 19.2	36.2 ± 15.0	33.2 ± 18.6	35.0 ± 16.5	38.4 ± 13.3	34.0 ± 18.8	36.7 ± 15.6	36.0 ± 17.1	32.6 ± 18.9	34.6 ± 17.9
Second pull ROM	69.2 ± 22.1	59.9 ± 17.2	65.5 ± 20.6	69.0 ± 22.4	57.2 ± 18.0	64.3 ± 21.4	70.4 ± 20.7	60.7 ± 13.8	66.5 ± 18.7	68.1 ± 22.9	59.0 ± 12.7	64.7 ± 20.0	69.2 ± 21.8	59.2 ± 15.5	65.2 ± 20.1
Ankle
Beg. first pull	6.5 ± 5.7	1.3 ± 6.0	4.4 ± 6.3	6.6 ± 5.9	-0.1 ± 10.1	3.9 ± 8.5	5.4 ± 6.0	-1.5 ± 10.0	2.6 ± 8.5	5.5 ± 6.4	1.5 ± 6.8	4.0 ± 6.8	6.0 ± 6.0	0.3 ± 8.4	3.7 ± 7.6
Beg. lap	-2.3 ± 6.6	-1.3 ± 6.0	-1.9 ± 6.3	-3.9 ± 7.3	-7.4 ± 10.3	-5.4 ± 8.7	-3.9 ± 8.8	-4.8 ± 10.0	-4.3 ± 9.2	-3.8 ± 9.7	-2.4 ± 9.0	-3.3 ± 9.3	-3.5 ± 8.1	-4.0 ± 9.2	-3.7 ± 8.5
Beg. second pull	11.0 ± 8.7	8.0 ± 10.0	9.8 ± 9.3	12.3 ± 12.3	7.2 ± 11.6	10.3 ± 12.2	12.7 ± 11.0	7.4 ± 7.8	10.6 ± 10.1	12.7 ± 10.3	7.0 ± 7.4	10.5 ± 9.7	12.2 ± 10.6	7.4 ± 9.3	10.3 ± 10.3
Lift completion	-14.2 ± 13.8	-15.3 ± 12.2	-14.6 ± 13.1	-7.5 ± 17.4	-10.9 ± 17.4	-8.9 ± 17.4	-8.4 ± 22.9	-15.0 ± 16.5	-11.1 ± 20.7	-1.1 ± 20.4	-19.5 ± 13.1	-8.1 ± 20.0	-7.8 ± 19.3	-15.0 ± 15.1	-10.7 ± 18.1
First pull ROM	14.6 ± 7.3	12.9 ± 5.0	13.9 ± 6.4	15.9 ± 7.1	16.5 ± 12.5	16.1 ± 9.6	18.2 ± 7.1	15.7 ± 6.1	17.2 ± 6.8	20.0 ± 8.1	17.1 ± 5.7	18.9 ± 7.4	17.2 ± 7.6	15.5 ± 8.0	16.5 ± 7.8
Lap ROM	13.6 ± 7.4	13.0 ± 8.6	13.4 ± 7.8	17.9 ± 10.3	17.7 ± 12.2	17.8 ± 11.0	21.4 ± 7.4	17.2 ± 9.0	19.7 ± 8.3	24.0 ± 12.7	18.5 ± 7.1	21.9 ± 11.1	19.2 ± 10.3	16.5 ± 9.6	18.1 ± 10.1
Second pull ROM	31.2 ± 12.8	33.3 ± 10.4	32.1 ± 11.8	32.5 ± 11.9	38.2 ± 11.6	34.8 ± 12.0	32.9 ± 13.7	39.1 ± 11.6	35.4 ± 13.1	37.2 ± 15.1	38.9 ± 10.4	37.8 ± 13.4	33.4 ± 13.4	37.3 ± 11.1	35.0 ± 12.7
Duration
Recovery	1.074 ± 0.492	1.101 ± 0.513	1.085 ± 0.497	1.514 ± 1.195	1.393 ± 1.098	1.466 ± 1.149	1.549 ± 1.029	1.895 ± 1.205	1.687 ± 1.106	2.828 ± 2.458	2.964 ± 2.208	2.879 ± 2.348	1.734 ± 1.595	1.802 ± 1.508	1.761 ± 1.559
Initial grip	0.772 ± 0.483	1.140 ± 0.721	0.919 ± 0.612	0.999 ± 0.792	1.423 ± 1.041	1.168 ± 0.915	1.316 ± 1.081	1.846 ± 1.303	1.528 ± 1.193	2.325 ± 1.990	2.945 ± 2.058	2.543 ± 2.017	1.346 ± 1.341	1.778 ± 1.457	1.514 ± 1.400
First pull	0.852 ± 0.201	0.842 ± 0.143	0.848 ± 0.178	0.901 ± 0.269	1.055 ± 0.532	0.962 ± 0.399	1.083 ± 0.294	1.038 ± 0.171	1.065 ± 0.251	1.347 ± 0.436	1.264 ± 0.321	1.316 ± 0.396	1.043 ± 0.364	1.043 ± 0.357	1.043 ± 0.360
Lap	0.688 ± 0.432	0.778 ± 0.707	0.724 ± 0.554	0.947 ± 0.692	1.021 ± 0.753	0.976 ± 0.712	1.263 ± 0.677	1.420 ± 0.860	1.326 ± 0.753	2.536 ± 1.672	2.013 ± 1.092	2.340 ± 1.492	1.350 ± 1.203	1.285 ± 0.960	1.325 ± 1.112
Second pull	1.336 ± 0.249	1.221 ± 0.379	1.290 ± 0.310	1.501 ± 0.332	1.272 ± 0.372	1.409 ± 0.364	1.557 ± 0.232	1.449 ± 0.416	1.514 ± 0.320	2.234 ± 0.769	1.821 ± 0.643	2.079 ± 0.746	1.653 ± 0.561	1.428 ± 0.506	1.564 ± 0.550
Entire repetition	4.722 ± 0.984	5.081 ± 1.467	4.865 ± 1.202	5.862 ± 2.396	6.163 ± 2.762	5.982 ± 2.530	6.768 ± 2.325	7.649 ± 3.044	7.120 ± 2.647	11.270 ± 5.536	11.366 ± 4.356	11.304 ± 5.110	7.126 ± 4.057	7.356 ± 3.720	7.216 ± 3.923

## Sheet: Table S2
Between-instant ANOVA results
	Instance
Identifier	p-value
Hip
Repetition 1 joint instances	1.62e-41		Red text	p < 0.05
Repetition 1 joint ROM	2.67e-16
Repetition 2 joint instances	3.01e-42
Repetition 2 joint ROM	3.1e-17
Repetition 3 joint instances	2.83e-42
Repetition 3 joint ROM	2.7e-18
Repetition 4 joint instances	8.09e-35
Repetition 4 joint ROM	6.6e-08
Average joint instances	1.06e-179
Average joint ROM	1.45e-54
Knee
Repetition 1 joint instances	1.07e-43
Repetition 1 joint ROM	1.98e-16
Repetition 2 joint instances	1.99e-40
Repetition 2 joint ROM	4.87e-14
Repetition 3 joint instances	3e-48
Repetition 3 joint ROM	8.6e-19
Repetition 4 joint instances	3.55e-43
Repetition 4 joint ROM	3.27e-13
Average joint instances	9.27e-178
Average joint ROM	1.1e-61
Ankle
Repetition 1 joint instances	2.58e-21
Repetition 1 joint ROM	2.63e-19
Repetition 2 joint instances	1.53e-11
Repetition 2 joint ROM	6.67e-17
Repetition 3 joint instances	5.29e-11
Repetition 3 joint ROM	1.54e-17
Repetition 4 joint instances	1.03e-11
Repetition 4 joint ROM	2.3e-15
Average joint instances	2.03e-48
Average joint ROM	8.27e-68
Duration
Repetition 1	1.6e-07
Repetition 2	0.000476
Repetition 3	0.000192
Repetition 4	6.7e-06
Average repetition	2.29e-13

## Sheet: Table S3
Between-instant pairwise comparisons
		Average
		Male				Female				Group
Parameter 1	Parameter 2	p-value	Cohen's d	CI low	CI high	p-value	Cohen's d	CI low	CI high	p-value	Cohen's d	CI low	CI high
Hip
Beg. first pull	Lift completion	4.15e-69	4.67763	4.31	5.14	1.06e-46	4.18951	3.58	5.01	1.44e-111	3.86048	3.55	4.24			Large effect size (> 0.8)
Beg. lap	Beg. second pull	4.73e-15	-1.00559	-1.3	-0.73	2.48e-08	-0.599907	-0.92	-0.32	1.67e-22	-0.796447	-1.02	-0.6			Medium effect size (0.5 > es ≥ 0.8)
Beg. lap	Beg. first pull	3.6e-70	-2.85413	-3.2	-2.55	1.19e-51	-2.88799	-3.53	-2.4	7.8e-118	-2.55408	-2.83	-2.3			Small effect size (0.2 > es ≥ 0.5)
Beg. lap	Lift completion	4.1e-16	1.2668	1.01	1.54	4.83e-10	1.12217	0.85	1.41	6.84e-25	1.10385	0.9	1.33			Negligible effect size (≤ 0.2)
Beg. second pull	Beg. first pull	6e-29	-1.38376	-1.67	-1.14	3.4e-29	-1.9319	-2.39	-1.57	1.03e-54	-1.52466	-1.75	-1.32		Red text	p < 0.05
Beg. second pull	Lift completion	1.07e-34	2.1333	1.81	2.52	3.59e-16	1.5919	1.32	1.92	2.63e-48	1.82208	1.6	2.06
First pull	Lap	2.76e-26	1.49625	1.19	1.86	4.59e-25	2.41282	2.01	2.99	4.41e-47	1.84793	1.59	2.12
First pull	Second pull	0.00084	0.419436	0.16	0.69	0.022	0.448165	0.15	0.77	7.5e-05	0.42266	0.22	0.62
Lap	Second pull	3.51e-19	-0.926021	-1.21	-0.66	6.87e-20	-1.24573	-1.57	-1	2.97e-36	-1.0648	-1.27	-0.89
Knee
Beg. first pull	Lift completion	2.12e-61	3.45226	2.97	3.98	5.21e-38	2.96275	2.48	3.63	2.13e-98	3.24774	2.88	3.65
Beg. lap	Beg. second pull	1.06e-24	-1.15929	-1.45	-0.9	1.64e-20	-1.72943	-2.11	-1.41	3.21e-44	-1.29455	-1.53	-1.1
Beg. lap	Beg. first pull	1	0.144653	-0.06	0.37	0.141	-0.3574	-0.66	-0.08	1	-0.0287	-0.21	0.14
Beg. lap	Lift completion	7.32e-48	2.66753	2.36	3.08	3.83e-31	2.64523	2.25	3.13	5.24e-75	2.56748	2.32	2.83
Beg. second pull	Beg. first pull	6.66e-29	1.47264	1.18	1.8	7.2e-11	1.38992	1.08	1.71	1.01e-37	1.42188	1.22	1.63
Beg. second pull	Lift completion	1.42e-65	3.75937	3.29	4.4	3.95e-49	4.0676	3.51	4.84	1.57e-110	3.7949	3.43	4.21
First pull	Lap	0.276	0.194629	-0.05	0.43	0.188	0.309481	0.03	0.62	0.037	0.238892	0.07	0.41
First pull	Second pull	1.09e-28	-1.52713	-1.83	-1.24	2.47e-14	-1.4625	-1.83	-1.15	1.5e-41	-1.46714	-1.69	-1.27
Lap	Second pull	1.2e-45	-1.69188	-1.98	-1.44	3.15e-36	-1.53956	-1.92	-1.22	8.55e-77	-1.60644	-1.82	-1.4
Ankle
Beg. first pull	Lift completion	3.43e-13	0.966755	0.69	1.29	1.05e-10	1.24992	0.89	1.72	3.14e-23	1.0402	0.81	1.31
Beg. lap	Beg. second pull	8.46e-37	-1.66594	-2	-1.38	2.04e-16	-1.24214	-1.68	-0.92	1.79e-51	-1.47796	-1.71	-1.25
Beg. lap	Beg. first pull	6.54e-21	-1.33158	-1.65	-1.07	0.00066	-0.485809	-0.79	-0.18	4.55e-22	-0.916238	-1.14	-0.69
Beg. lap	Lift completion	0.06	0.293099	0.04	0.55	5.36e-06	0.881548	0.56	1.28	1.4e-06	0.496598	0.29	0.73
Beg. second pull	Beg. first pull	1.91e-09	0.724294	0.47	1.02	2.11e-10	0.809255	0.49	1.16	1.25e-18	0.728772	0.53	0.93
Beg. second pull	Lift completion	9.9e-26	1.28655	1	1.66	2.81e-18	1.79215	1.37	2.38	2.85e-43	1.42793	1.19	1.72
First pull	Lap	0.083	-0.222473	-0.47	0.01	0.753	-0.119249	-0.43	0.16	0.04	-0.180814	-0.38	0.0048
First pull	Second pull	1.4e-31	-1.487	-1.73	-1.29	1.98e-28	-2.25387	-2.9	-1.71	6.78e-58	-1.75583	-2.02	-1.53
Lap	Second pull	2.87e-18	-1.18589	-1.44	-0.95	7.47e-24	-2.00759	-2.42	-1.63	2.43e-39	-1.47088	-1.71	-1.28
Duration
Recovery	Initial grip	0.037	0.263145	0.03	0.48	1	0.0163406	-0.27	0.29	0.165	0.166577	-0.02	0.35
Recovery	First pull	1.09e-06	0.596635	0.45	0.76	2.13e-05	0.692819	0.46	0.89	6.81e-12	0.63425	0.52	0.76
Recovery	Lap	0.043	0.271431	0.05	0.48	0.027	0.408906	0.15	0.69	0.000252	0.322089	0.15	0.48
Recovery	Second pull	1	0.0677047	-0.19	0.27	0.196	0.332069	0.07	0.57	0.548	0.167904	-0.003	0.32
Initial grip	First pull	0.029	0.307892	0.1	0.49	8.74e-06	0.69291	0.49	0.91	2.12e-07	0.460391	0.32	0.59
Initial grip	Lap	1	-0.00338694	-0.25	0.24	0.002	0.399314	0.12	0.64	0.213	0.149704	-0.03	0.33
Initial grip	Second pull	0.038	-0.298536	-0.66	-0.05	0.069	0.32026	0.05	0.56	1	-0.0475261	-0.25	0.11
First pull	Lap	0.005	-0.345293	-0.53	-0.14	0.082	-0.334455	-0.57	-0.05	9.03e-05	-0.340464	-0.49	-0.18
First pull	Second pull	2.2e-39	-1.28957	-1.56	-1.08	2.18e-10	-0.880129	-1.23	-0.59	1.15e-45	-1.12115	-1.32	-0.95
Lap	Second pull	0.002	-0.322373	-0.62	-0.09	0.968	-0.186774	-0.51	0.1	0.000314	-0.273403	-0.5	-0.09

## Sheet: Table S4
Between-sex pairwise comparisons
	Repetition 1				Repetition 2				Repetition 3				Repetition 4				Mean
Identifier	p-value	Cohen's d	CI low	CI high	p-value	Cohen's d	CI low	CI high	p-value	Cohen's d	CI low	CI high	p-value	Cohen's d	CI low	CI high	p-value	Cohen's d	CI low	CI high
Hip
Beg. first pull	5.31e-06	1.3576	0.82	2.06	1.83e-06	1.44587	0.92	2.25	3.56e-05	1.22606	0.65	2	0.002	0.921816	0.32	1.72	2.18e-16	1.21081	0.87	1.55			Large effect size (> 0.8)
Beg. lap	0.013	0.682834	0.18	1.19	0.029	0.604095	0.13	1.11	0.000465	1.01247	0.51	1.59	0.005	0.827595	0.33	1.46	4.46e-08	0.773099	0.54	1.02			Medium effect size (0.5 > es ≥ 0.8)
Beg. second pull	0.648	0.123031	-0.45	0.66	0.344	0.256547	-0.31	0.76	0.288	0.291837	-0.23	0.86	0.097	0.484562	-0.1	1.06	0.034	0.291529	0.03	0.57			Small effect size (0.2 > es ≥ 0.5)
Lift completion	0.343	0.243454	-0.33	0.86	0.005	0.747349	0.23	1.27	8.55e-05	1.13933	0.74	1.64	5.65e-06	1.46759	0.94	2.13	1.05e-09	0.852984	0.6	1.11			Negligible effect size (≤ 0.2)
First pull ROM	0.002	0.847693	0.34	1.41	0.000157	1.0903	0.62	1.75	0.502	0.185173	-0.31	0.75	0.282	0.302435	-0.28	0.92	5.21e-05	0.56062	0.29	0.83		Red text	p < 0.05
Lap ROM	0.318	-0.273078	-0.8	0.25	0.117	-0.430475	-1.01	0.1	0.021	-0.65138	-1.27	-0.11	0.051	-0.566444	-1.32	0.03	0.001	-0.45875	-0.73	-0.19
Second pull ROM	0.088	0.451041	-0.09	0.99	0.244	0.301564	-0.27	0.82	0.481	0.190632	-0.43	0.77	0.378	-0.24873	-0.99	0.33	0.181	0.179111	-0.12	0.47
Knee
Beg. first pull	0.266	-0.29394	-0.83	0.25	0.491	-0.182337	-0.65	0.37	0.991	0.00281341	-0.47	0.6	0.151	-0.383828	-1.04	0.26	0.14	-0.195265	-0.46	0.07
Beg. lap	0.119	-0.441088	-0.91	0.02	0.02	-0.662281	-1.16	-0.22	0.009	-0.730352	-1.25	-0.23	0.065	-0.536518	-1.15	-0.02	3.65e-05	-0.583381	-0.86	-0.32
Beg. second pull	0.162	-0.383868	-0.96	0.09	0.162	-0.382807	-0.96	0.1	0.068	-0.499718	-1.19	-0.01	0.302	-0.30054	-0.89	0.24	0.004	-0.393514	-0.7	-0.12
Lift completion	0.899	0.0336549	-0.49	0.55	0.341	0.244016	-0.33	0.75	0.59	0.143968	-0.35	0.7	0.947	0.0195181	-0.45	0.57	0.364	0.121527	-0.14	0.38
First pull ROM	0.993	-0.00225957	-0.48	0.51	0.378	-0.245768	-0.74	0.3	0.711	-0.0995818	-0.65	0.44	0.854	-0.0500742	-0.69	0.49	0.456	-0.101607	-0.39	0.16
Lap ROM	0.632	-0.12673	-0.64	0.35	0.487	-0.185128	-0.71	0.38	0.497	-0.176102	-0.78	0.38	0.315	-0.267806	-0.91	0.36	0.156	-0.187681	-0.49	0.09
Second pull ROM	0.087	-0.470777	-1.02	0.06	0.036	-0.579251	-1.22	-0.09	0.05	-0.548414	-1.2	-0.05	0.1	-0.492962	-1.06	0.06	0.000169	-0.527048	-0.8	-0.26
Ankle
Beg. first pull	0.002	-0.877993	-1.48	-0.37	0.002	-0.811366	-1.4	-0.29	0.002	-0.83482	-1.38	-0.33	0.031	-0.609784	-1.18	-0.09	5.38e-09	-0.784917	-1.04	-0.53
Beg. lap	0.56	0.15689	-0.39	0.7	0.137	-0.386969	-0.96	0.14	0.715	-0.0960041	-0.66	0.44	0.571	0.159589	-0.36	0.75	0.648	-0.0605692	-0.33	0.2
Beg. second pull	0.223	-0.322228	-0.87	0.22	0.114	-0.427537	-0.99	0.12	0.044	-0.561976	-1.16	-0.07	0.033	-0.631699	-1.21	-0.13	0.000483	-0.480442	-0.75	-0.24
Lift completion	0.752	-0.0852406	-0.66	0.42	0.466	-0.194632	-0.76	0.37	0.236	-0.327131	-0.85	0.19	0.000526	-1.07628	-1.8	-0.51	0.003	-0.414615	-0.68	-0.15
First pull ROM	0.315	-0.277575	-0.77	0.22	0.823	0.0564292	-0.7	0.46	0.157	-0.385324	-0.98	0.14	0.153	-0.418805	-0.99	0.09	0.106	-0.216114	-0.54	0.06
Lap ROM	0.772	-0.0759866	-0.64	0.48	0.939	-0.0200406	-0.57	0.48	0.054	-0.5122	-1.2	-0.0099	0.076	-0.532885	-1.06	-0.05	0.049	-0.266973	-0.55	-0.02
Second pull ROM	0.498	0.184236	-0.32	0.72	0.07	0.490118	-0.02	1.16	0.077	0.484359	-0.05	1.15	0.645	0.134165	-0.38	0.77	0.021	0.31833	0.08	0.6
Duration
Recovery	1	0.0528165	-0.52	0.62	1	-0.106018	-0.63	0.4	1	0.308631	-0.19	0.91	1	0.0583698	-0.46	0.66	1	0.0438559	-0.21	0.3
Initial grip	0.105	0.599161	0.06	1.14	0.39	0.458903	-0.06	0.92	0.46	0.443095	-0.03	0.92	1	0.306414	-0.22	0.93	0.126	0.308317	0.06	0.59
First pull	1	-0.0559217	-0.54	0.5	0.715	0.366324	-0.15	0.76	1	-0.187038	-0.68	0.33	1	-0.216636	-0.8	0.3	1	-0.00164825	-0.27	0.22
Lap	1	0.15272	-0.51	0.61	1	0.101784	-0.45	0.61	1	0.203726	-0.34	0.71	1	-0.370826	-0.95	0.13	1	-0.0599329	-0.34	0.21
Second pull	0.81	-0.357615	-1.13	0.16	0.08	-0.648819	-1.43	-0.09	1	-0.320176	-1.16	0.24	0.22	-0.583043	-1.18	-0.04	0.012	-0.420072	-0.72	-0.17
Entire repetition	1	0.287721	-0.27	0.9	1	0.116706	-0.45	0.62	0.836	0.325349	-0.21	0.84	1	0.0191811	-0.51	0.6	1	0.0589348	-0.2	0.33

## Sheet: Table S5
Two-way mixed model ANOVA results
	Sex		Repetition		Sex:Repetition
Identifier	p-value	part eta sq	p-value	part eta sq	p-value	part eta sq
Hip
Beg. first pull	2.87e-05	0.308	4.63e-05	0.193	0.596	0.01			Large effect size (> 0.14)
Beg. lap	0.003	0.169	0.009	0.096	0.234	0.03			Medium/large effect size (0.06 > es ≥ 0.14)
Beg. second pull	0.112	0.052	0.543	0.013	0.498	0.015			Small/medium effect size (0.01 > es ≥ 0.06)
Lift completion	0.000485	0.226	0.000514	0.134	1.3e-05	0.191			Small effect size (≤ 0.01)
First pull ROM	0.01	0.131	6.83e-05	0.185	0.102	0.047		Red text	p < 0.05
Lap ROM	0.072	0.066	1.84e-08	0.316	0.183	0.035
Second pull ROM	0.33	0.02	0.019	0.074	0.00011	0.156
Knee
Beg. first pull	0.204	0.03	4.8e-11	0.312	0.219	0.027
Beg. lap	0.058	0.065	6.2e-07	0.198	0.857	0.004
Beg. second pull	0.193	0.031	0.292	0.023	0.832	0.004
Lift completion	0.638	0.004	0.408	0.018	0.938	0.003
First pull ROM	0.613	0.005	0.009	0.079	0.449	0.015
Lap ROM	0.332	0.017	0.148	0.034	0.937	0.001
Second pull ROM	0.068	0.06	0.4	0.018	0.793	0.005
Ankle
Beg. first pull	0.000292	0.221	0.126	0.036	0.098	0.04
Beg. lap	0.782	0.001	0.089	0.042	0.424	0.017
Beg. second pull	0.019	0.1	0.819	0.005	0.841	0.004
Lift completion	0.022	0.095	0.279	0.024	0.036	0.056
First pull ROM	0.058	0.066	4.87e-07	0.183	0.943	0.002
Lap ROM	0.043	0.075	2.95e-09	0.267	0.207	0.029
Second pull ROM	0.12	0.045	0.01	0.068	0.346	0.021
Duration
Recovery	0.651	0.004	1.94e-07	0.289	0.58	0.009
Initial grip	0.099	0.051	9.67e-09	0.354	0.672	0.006
First pull	0.685	0.003	2.06e-18	0.553	0.286	0.023
Lap	0.448	0.011	2.41e-11	0.442	0.228	0.027
Second pull	0.019	0.097	1.53e-13	0.494	0.175	0.033
Entire repetition	0.608	0.005	2.23e-15	0.578	0.611	0.007

## Sheet: Table S6
Between-repetition pairwise comparisons
		Hip												Knee												Ankle
		Male				Female				Group				Male				Female				Group				Male				Female				Group
Parameter 1	Parameter 2	p-value	Cohen's d	CI low	CI high	p-value	Cohen's d	CI low	CI high	p-value	Cohen's d	CI low	CI high	p-value	Cohen's d	CI low	CI high	p-value	Cohen's d	CI low	CI high	p-value	Cohen's d	CI low	CI high	p-value	Cohen's d	CI low	CI high	p-value	Cohen's d	CI low	CI high	p-value	Cohen's d	CI low	CI high
Beg. first pull
Repetition 1	Repetition 2	1	0.100043	-0.39	0.64	1	0.0440548	-0.53	0.69	1	0.0623165	-0.32	0.44	0.177	0.19638	-0.28	0.68	1	0.0818486	-0.52	0.68	0.229	0.14943	-0.21	0.52	1	-0.0276291	-0.52	0.45	1	0.171116	-0.4	0.76	1	0.0646945	-0.28	0.43			Large effect size (> 0.8)
Repetition 1	Repetition 3	0.804	0.185964	-0.31	0.77	0.154	0.304318	-0.3	0.95	0.044	0.185494	-0.19	0.55	0.002	0.554593	0.12	1.03	0.513	0.232066	-0.44	0.81	0.000464	0.422599	0.08	0.8	0.618	0.188798	-0.28	0.68	0.222	0.347281	-0.23	0.91	0.046	0.243008	-0.13	0.56			Medium effect size (0.5 > es ≥ 0.8)
Repetition 1	Repetition 4	0.08	0.433916	-0.03	1.02	0.039	0.436491	-0.11	1.05	0.001	0.388961	0.01	0.8	2.77e-06	0.781223	0.32	1.37	0.028	0.704818	0.11	1.39	8.1e-08	0.733115	0.38	1.13	1	0.161406	-0.32	0.65	1	-0.0222438	-0.65	0.57	1	0.0643432	-0.33	0.4			Small effect size (0.2 > es ≥ 0.5)
Repetition 2	Repetition 3	1	0.0806811	-0.39	0.62	0.315	0.270218	-0.31	0.83	0.26	0.12172	-0.24	0.48	0.033	0.345466	-0.09	0.78	0.93	0.149216	-0.45	0.78	0.01	0.267344	-0.08	0.59	1	0.212766	-0.27	0.68	1	0.1431	-0.43	0.74	0.924	0.157296	-0.21	0.53			Negligible effect size (≤ 0.2)
Repetition 2	Repetition 4	0.118	0.336922	-0.18	0.86	0.076	0.410489	-0.18	0.97	0.003	0.332204	-0.06	0.73	9.78e-05	0.545854	0.07	0.98	0.01	0.628282	0.0021	1.36	4.16e-07	0.572349	0.21	0.96	1	0.185156	-0.3	0.71	0.984	-0.181619	-0.82	0.39	1	-0.00818964	-0.39	0.35		Red text	p < 0.05
Repetition 3	Repetition 4	0.228	0.27426	-0.21	0.8	0.094	0.190404	-0.43	0.77	0.009	0.228164	-0.15	0.62	0.046	0.174007	-0.29	0.68	0.004	0.496415	-0.1	1.21	0.000101	0.308078	-0.05	0.72	1	-0.0211479	-0.53	0.49	0.197	-0.351509	-0.87	0.2	0.66	-0.182037	-0.53	0.22
Beg. lap
Repetition 1	Repetition 2	0.000396	0.330412	-0.19	0.83	6.48e-05	0.401285	-0.17	1.06	1.5e-08	0.347263	-0.02	0.76	1	-0.0363066	-0.51	0.46	0.654	0.292688	-0.3	0.9	1	0.0472952	-0.34	0.44	0.93	0.241314	-0.24	0.72	0.064	0.724659	0.17	1.3	0.022	0.45688	0.09	0.84
Repetition 1	Repetition 3	0.218	0.364549	-0.11	0.92	1	0.0738282	-0.55	0.68	0.248	0.195569	-0.21	0.57	0.138	-0.328063	-0.85	0.12	1	-0.246771	-0.91	0.36	0.062	-0.288619	-0.66	0.08	1	0.209686	-0.27	0.7	0.517	0.42908	-0.18	1.05	0.351	0.30384	-0.03	0.66
Repetition 1	Repetition 4	1	0.168305	-0.35	0.73	1	-0.0950286	-0.73	0.5	1	0.0505829	-0.31	0.43	0.003	-0.577296	-1.11	-0.12	0.068	-0.867171	-1.6	-0.27	8.04e-05	-0.64698	-1.04	-0.28	1	0.190777	-0.27	0.73	1	0.141583	-0.5	0.76	1	0.177005	-0.2	0.56
Repetition 2	Repetition 3	1	0.0115281	-0.52	0.52	0.145	-0.340652	-0.98	0.21	0.58	-0.152361	-0.54	0.22	0.151	-0.281916	-0.84	0.18	0.149	-0.512005	-1.13	0.01	0.009	-0.329069	-0.73	0.01	1	-0.00530228	-0.48	0.47	1	-0.256015	-0.9	0.28	1	-0.120425	-0.48	0.23
Repetition 2	Repetition 4	1	-0.136743	-0.66	0.37	0.035	-0.468792	-1.06	0.15	0.095	-0.263141	-0.67	0.12	0.004	-0.527663	-1.1	-0.05	0.01	-1.11274	-1.72	-0.56	1.72e-05	-0.67527	-1.09	-0.29	1	-0.0115328	-0.49	0.48	1	-0.521071	-1.16	0.04	1	-0.229151	-0.61	0.13
Repetition 3	Repetition 4	1	-0.155044	-0.71	0.39	1	-0.166293	-0.74	0.46	0.936	-0.126274	-0.56	0.26	0.287	-0.292966	-0.79	0.17	0.143	-0.582284	-1.25	-0.03	0.03	-0.386284	-0.81	-0.03	1	-0.00602556	-0.47	0.5	1	-0.258094	-0.85	0.35	1	-0.106734	-0.5	0.25
Beg. second pull
Repetition 1	Repetition 2	1	0.0223555	-0.49	0.53	1	-0.122973	-0.68	0.45	1	-0.0430906	-0.43	0.34	1	-0.0391364	-0.55	0.42	1	-0.0253821	-0.62	0.58	1	-0.0338932	-0.4	0.32	1	-0.127168	-0.65	0.35	1	0.068921	-0.57	0.64	1	-0.0460768	-0.45	0.28
Repetition 1	Repetition 3	1	0.0770528	-0.43	0.67	1	-0.0983306	-0.7	0.49	1	-0.00806795	-0.36	0.39	1	-0.124573	-0.56	0.36	1	-0.097191	-0.65	0.49	0.696	-0.112775	-0.45	0.25	1	-0.176785	-0.76	0.3	1	0.0652804	-0.55	0.69	1	-0.0826769	-0.46	0.29
Repetition 1	Repetition 4	1	0.206795	-0.3	0.84	1	-0.189863	-0.78	0.38	1	0.0361979	-0.37	0.44	1	0.0168186	-0.45	0.47	1	-0.0926703	-0.65	0.52	1	-0.0255832	-0.37	0.37	1	-0.179967	-0.68	0.32	1	0.108185	-0.45	0.8	1	-0.0816013	-0.47	0.31
Repetition 2	Repetition 3	1	0.0507168	-0.43	0.58	1	0.0250498	-0.57	0.63	1	0.0344887	-0.35	0.43	1	-0.0786047	-0.57	0.43	1	-0.0668217	-0.63	0.58	1	-0.073047	-0.45	0.29	1	-0.0340847	-0.51	0.43	1	-0.0164688	-0.6	0.67	1	-0.0269954	-0.38	0.35
Repetition 2	Repetition 4	1	0.176484	-0.32	0.74	1	-0.0649155	-0.69	0.57	1	0.0747243	-0.35	0.47	1	0.0555686	-0.38	0.57	1	-0.0624008	-0.64	0.54	1	0.0095359	-0.34	0.4	1	-0.0319892	-0.52	0.47	1	0.0210896	-0.58	0.69	1	-0.0248854	-0.4	0.34
Repetition 3	Repetition 4	1	0.134331	-0.38	0.66	1	-0.0905521	-0.71	0.55	0.493	0.0429483	-0.4	0.45	0.449	0.14301	-0.34	0.63	1	0.00502103	-0.59	0.66	0.322	0.0872747	-0.28	0.45	1	0.00321733	-0.45	0.49	1	0.048487	-0.55	0.7	1	0.0028668	-0.38	0.4
Lift completion
Repetition 1	Repetition 2	1	0.122727	-0.36	0.63	0.009	-0.35226	-0.95	0.23	0.316	-0.166435	-0.54	0.22	1	-0.172526	-0.66	0.29	0.224	-0.36552	-0.93	0.22	0.346	-0.258927	-0.61	0.12	0.127	-0.425269	-0.89	0.06	0.672	-0.292443	-0.89	0.29	0.028	-0.374472	-0.72	-0.03
Repetition 1	Repetition 3	0.007	0.722468	0.27	1.25	0.407	-0.35493	-0.91	0.27	1	0.0577714	-0.31	0.47	1	-0.122205	-0.52	0.38	0.972	-0.279569	-0.85	0.36	1	-0.18351	-0.51	0.17	0.774	-0.302646	-0.75	0.17	1	-0.02093	-0.58	0.55	1	-0.203651	-0.54	0.19
Repetition 1	Repetition 4	0.000471	1.24344	0.72	1.93	1	-0.174559	-0.79	0.41	0.106	0.447702	0.06	0.85	1	-0.11817	-0.55	0.38	1	-0.143518	-0.81	0.48	1	-0.125248	-0.46	0.24	0.014	-0.751675	-1.25	-0.27	0.786	0.334562	-0.23	1.1	0.156	-0.38523	-0.73	-0.04
Repetition 2	Repetition 3	0.006	0.604345	0.12	1.12	1	0.0176827	-0.56	0.65	0.209	0.205338	-0.17	0.58	1	0.0142159	-0.38	0.58	1	0.0833591	-0.46	0.7	1	0.043567	-0.3	0.46	1	0.0467043	-0.4	0.55	1	0.241539	-0.34	0.83	1	0.116969	-0.23	0.53
Repetition 2	Repetition 4	0.000143	1.13274	0.65	1.77	1	0.233095	-0.38	0.82	0.000696	0.575069	0.2	0.92	1	0.0312353	-0.44	0.56	1	0.275862	-0.32	0.81	1	0.129091	-0.28	0.47	0.996	-0.3383	-0.85	0.14	0.295	0.560985	0.01	1.24	1	-0.040363	-0.42	0.32
Repetition 3	Repetition 4	0.038	0.549561	0.05	1.16	0.204	0.230516	-0.39	0.84	0.003	0.357247	-0.01	0.73	1	0.0130936	-0.47	0.44	1	0.182417	-0.46	0.71	1	0.071968	-0.32	0.41	1	-0.339366	-0.9	0.12	1	0.304941	-0.26	0.92	1	-0.146909	-0.51	0.23
ROM first pull
Repetition 1	Repetition 2	2.36e-05	-0.691891	-1.19	-0.23	6.12e-05	-0.695581	-1.39	-0.13	6.6e-10	-0.624082	-1	-0.26	0.1	-0.185684	-0.74	0.28	1	0.0140409	-0.63	0.63	0.517	-0.123584	-0.5	0.24	1	-0.176033	-0.67	0.23	0.984	-0.37431	-0.76	0.23	0.427	-0.269549	-0.59	0.09
Repetition 1	Repetition 3	5.09e-06	-1.06521	-1.61	-0.56	1	-0.234107	-0.86	0.35	0.001	-0.646395	-1.11	-0.26	1	-0.153985	-0.64	0.31	1	-0.100059	-0.69	0.51	1	-0.135637	-0.55	0.26	0.022	-0.503938	-1.03	-0.08	0.202	-0.498249	-1.12	0.07	0.002	-0.495701	-0.89	-0.13
Repetition 1	Repetition 4	0.00014	-0.982443	-1.67	-0.4	0.876	-0.385597	-1.14	0.24	0.000936	-0.642781	-1.09	-0.27	0.276	-0.326523	-0.81	0.19	0.161	-0.303012	-0.91	0.32	0.024	-0.321973	-0.7	0.04	0.003	-0.699791	-1.22	-0.18	0.01	-0.775552	-1.44	-0.22	1.74e-05	-0.716634	-1.12	-0.36
Repetition 2	Repetition 3	0.015	-0.377577	-0.92	0.17	0.415	0.533983	-0.04	1.14	1	0.0177786	-0.35	0.38	1	0.0540383	-0.41	0.51	1	-0.126559	-0.72	0.51	1	-0.00373915	-0.35	0.35	0.214	-0.329956	-0.83	0.16	1	0.079423	-0.74	0.49	1	-0.12885	-0.61	0.21
Repetition 2	Repetition 4	0.027	-0.379368	-1.05	0.13	1	0.143169	-0.51	0.75	1	-0.10993	-0.54	0.28	1	-0.130747	-0.62	0.33	0.204	-0.336003	-0.96	0.34	0.269	-0.209179	-0.58	0.16	0.017	-0.539551	-1.01	-0.08	0.022	-0.0616973	-1.09	0.38	0.000283	-0.322727	-0.82	0.04
Repetition 3	Repetition 4	1	-0.0449959	-0.6	0.45	1	-0.230242	-1.01	0.31	1	-0.129921	-0.55	0.26	0.678	-0.208318	-0.72	0.28	1	-0.228009	-0.81	0.4	0.251	-0.220193	-0.6	0.14	1	-0.234383	-0.73	0.25	0.313	-0.232831	-0.89	0.34	0.2	-0.23921	-0.62	0.13
ROM lap
Repetition 1	Repetition 2	1.87e-05	-0.593912	-1.19	-0.1	0.051	-0.372155	-0.98	0.21	2.4e-06	-0.496045	-0.89	-0.13	0.126	-0.199905	-0.7	0.3	0.846	-0.149496	-0.72	0.47	0.083	-0.180762	-0.55	0.17	0.003	-0.477593	-1.08	-0.04	0.077	-0.442638	-0.98	0.11	0.000116	-0.464653	-0.86	-0.09
Repetition 1	Repetition 3	0.000351	-0.98723	-1.59	-0.52	0.057	-0.496641	-1.06	0.07	2.7e-06	-0.745684	-1.17	-0.41	0.505	-0.196876	-0.68	0.26	1	-0.155686	-0.79	0.48	0.407	-0.180244	-0.54	0.18	7.98e-07	-1.0514	-1.65	-0.58	0.044	-0.474689	-1.04	0.07	3.56e-08	-0.783192	-1.16	-0.45
Repetition 1	Repetition 4	4.58e-05	-1.41029	-2.12	-0.89	0.026	-0.861205	-1.44	-0.29	8.16e-08	-1.14554	-1.58	-0.76	0.24	-0.331752	-0.83	0.14	1	-0.194256	-0.83	0.43	0.123	-0.279422	-0.66	0.09	8.76e-06	-1.00327	-1.53	-0.6	0.000828	-0.703253	-1.32	-0.18	7.32e-09	-0.889575	-1.26	-0.55
Repetition 2	Repetition 3	0.357	-0.365347	-0.82	0.12	1	-0.124247	-0.67	0.54	0.145	-0.244455	-0.6	0.11	1	0.0267821	-0.43	0.49	1	-0.00555243	-0.59	0.63	1	0.0133244	-0.36	0.39	0.071	-0.38768	-0.85	0.08	1	0.046719	-0.62	0.64	0.518	-0.191382	-0.6	0.18
Repetition 2	Repetition 4	0.029	-0.778596	-1.38	-0.3	0.448	-0.506866	-1.12	0.09	0.001	-0.647409	-1.06	-0.28	1	-0.100482	-0.54	0.4	1	-0.046245	-0.58	0.6	1	-0.0838404	-0.44	0.29	0.011	-0.528396	-1.01	-0.08	0.541	-0.0871161	-0.74	0.48	0.002	-0.371365	-0.73	-0.0089
Repetition 3	Repetition 4	0.048	-0.421879	-1.02	0.12	0.418	-0.387653	-1.05	0.2	0.003	-0.406766	-0.81	-0.01	1	-0.150935	-0.62	0.35	1	-0.040968	-0.67	0.56	1	-0.106172	-0.47	0.27	0.678	-0.252444	-0.72	0.25	0.143	-0.169435	-0.87	0.36	0.067	-0.229222	-0.59	0.16
ROM second pull
Repetition 1	Repetition 2	1	0.0613497	-0.45	0.54	0.262	0.155233	-0.44	0.77	0.642	0.110099	-0.25	0.51	1	0.00998159	-0.49	0.5	1	0.152382	-0.41	0.76	1	0.0573132	-0.34	0.43	1	-0.104914	-0.57	0.39	0.732	-0.445218	-1.04	0.07	0.618	-0.231689	-0.61	0.11
Repetition 1	Repetition 3	1	-0.165034	-0.62	0.35	1	0.149985	-0.39	0.76	1	0.00197362	-0.38	0.38	1	-0.0549078	-0.56	0.42	1	-0.0539563	-0.58	0.59	1	-0.0528504	-0.41	0.31	1	-0.131801	-0.57	0.36	0.395	-0.521622	-1.18	0.04	0.549	-0.269821	-0.63	0.11
Repetition 1	Repetition 4	0.002	-0.740131	-1.28	-0.25	0.378	0.102463	-0.5	0.76	0.505	-0.286445	-0.67	0.1	1	0.0496837	-0.43	0.56	1	0.0603359	-0.51	0.75	1	0.0396681	-0.33	0.41	0.124	-0.427499	-0.92	0.02	0.175	-0.536133	-1.22	0.08	0.009	-0.456299	-0.8	-0.08
Repetition 2	Repetition 3	0.317	-0.246467	-0.74	0.3	1	-0.0231399	-0.62	0.59	0.906	-0.116067	-0.54	0.26	1	-0.0647495	-0.5	0.42	0.194	-0.219577	-0.84	0.34	0.213	-0.111674	-0.47	0.25	1	-0.0352131	-0.53	0.47	1	-0.0728138	-0.66	0.55	1	-0.0485902	-0.42	0.33
Repetition 2	Repetition 4	0.001	-0.86649	-1.42	-0.4	1	-0.0585385	-0.67	0.58	0.039	-0.402514	-0.84	-0.02	1	0.0394984	-0.44	0.55	1	-0.113773	-0.72	0.45	1	-0.0192139	-0.39	0.35	0.359	-0.345199	-0.84	0.11	1	-0.0598791	-0.68	0.54	0.768	-0.236091	-0.58	0.16
Repetition 3	Repetition 4	0.011	-0.589264	-1.17	-0.08	1	-0.041468	-0.61	0.58	0.037	-0.307776	-0.69	0.08	1	0.10512	-0.32	0.59	1	0.13216	-0.45	0.79	1	0.095292	-0.25	0.51	0.666	-0.293972	-0.76	0.19	1	0.0169722	-0.64	0.68	1	-0.180221	-0.52	0.19
		Male				Female				Group
		p-value	Cohen's d	CI low	CI high	p-value	Cohen's d	CI low	CI high	p-value	Cohen's d	CI low	CI high
Duration recovery
Repetition 1	Repetition 2	0.297	-0.481624	-0.89	-0.09	1	-0.340533	-0.82	0.3	0.133	-0.430186	-0.72	-0.09
Repetition 1	Repetition 3	0.135	-0.588358	-1.01	-0.17	0.05	-0.857003	-1.43	-0.39	0.003	-0.702455	-1.02	-0.37
Repetition 1	Repetition 4	0.002	-0.98941	-1.4	-0.68	0.009	-1.16252	-1.83	-0.67	7.62e-06	-1.05739	-1.35	-0.8
Repetition 2	Repetition 3	1	-0.0310437	-0.5	0.44	0.012	-0.43555	-1.15	0.14	0.089	-0.196505	-0.65	0.18
Repetition 2	Repetition 4	0.006	-0.679849	-1.08	-0.24	0.000804	-0.901374	-1.59	-0.35	8.04e-06	-0.764792	-1.09	-0.48
Repetition 3	Repetition 4	0.009	-0.678868	-1.06	-0.31	0.019	-0.601283	-1.24	-0.0046	0.000159	-0.649467	-0.96	-0.32
Duration initial grip
Repetition 1	Repetition 2	0.43	-0.345664	-0.79	0.11	0.786	-0.316503	-0.86	0.33	0.106	-0.320311	-0.67	0.0021
Repetition 1	Repetition 3	0.015	-0.649532	-1.06	-0.25	0.029	-0.671092	-1.2	-0.18	0.000173	-0.642284	-0.97	-0.31
Repetition 1	Repetition 4	0.000376	-1.07284	-1.48	-0.8	0.004	-1.17121	-1.77	-0.74	5.87e-07	-1.09008	-1.42	-0.84
Repetition 2	Repetition 3	0.167	-0.334754	-0.77	0.14	0.071	-0.358985	-0.98	0.21	0.005	-0.338173	-0.72	0.06
Repetition 2	Repetition 4	0.000469	-0.876091	-1.23	-0.56	0.01	-0.933643	-1.58	-0.4	1.85e-06	-0.878022	-1.18	-0.6
Repetition 3	Repetition 4	0.001	-0.630409	-1.05	-0.24	0.034	-0.638137	-1.27	-0.06	1.48e-05	-0.612807	-0.96	-0.29
Duration first pull
Repetition 1	Repetition 2	0.678	-0.206569	-0.68	0.27	0.236	-0.547449	-0.95	-0.23	0.067	-0.371217	-0.62	-0.08
Repetition 1	Repetition 3	3.77e-06	-0.91987	-1.41	-0.47	8.04e-07	-1.24415	-1.85	-0.71	2.57e-11	-0.997162	-1.35	-0.62
Repetition 1	Repetition 4	4.7e-09	-1.45946	-1.93	-1.08	1.34e-05	-1.70047	-2.38	-1.24	2.89e-14	-1.52513	-1.89	-1.22
Repetition 2	Repetition 3	1.36e-08	-0.647052	-1.19	-0.18	1	0.0431092	-0.96	0.46	0.134	-0.307797	-0.86	0.05
Repetition 2	Repetition 4	1.48e-08	-1.23129	-1.76	-0.81	0.001	-0.47534	-1.61	0.1	9.36e-12	-0.889178	-1.47	-0.42
Repetition 3	Repetition 4	5.71e-05	-0.709272	-1.16	-0.28	0.001	-0.878549	-1.5	-0.37	4.72e-08	-0.75617	-1.12	-0.41
Duration lap
Repetition 1	Repetition 2	0.016	-0.448681	-0.9	-0.02	0.009	-0.332679	-1.05	0.23	0.000131	-0.395771	-0.77	-0.03
Repetition 1	Repetition 3	8.58e-05	-1.01159	-1.5	-0.61	0.004	-0.816666	-1.55	-0.23	1.77e-07	-0.91055	-1.32	-0.5
Repetition 1	Repetition 4	9.12e-07	-1.5135	-2.01	-1.18	8.94e-06	-1.34261	-2.31	-0.77	7.5e-11	-1.43544	-1.8	-1.15
Repetition 2	Repetition 3	0.066	-0.461145	-0.95	-0.0053	0.042	-0.494728	-1.11	0.07	0.001	-0.477027	-0.87	-0.15
Repetition 2	Repetition 4	2.11e-05	-1.24206	-1.69	-0.87	9.6e-05	-1.05764	-1.75	-0.49	9.84e-09	-1.16623	-1.51	-0.89
Repetition 3	Repetition 4	0.000124	-0.99837	-1.46	-0.57	0.013	-0.602532	-1.26	-0.01	1.13e-06	-0.85802	-1.18	-0.53
Duration second pull
Repetition 1	Repetition 2	0.012	-0.563072	-1.02	-0.11	1	-0.135399	-0.75	0.43	0.041	-0.353761	-0.71	0.01
Repetition 1	Repetition 3	2.57e-05	-0.91969	-1.52	-0.44	0.028	-0.573642	-1.19	-0.01	9.42e-07	-0.711961	-1.12	-0.35
Repetition 1	Repetition 4	1.34e-07	-1.57142	-1.98	-1.27	3.35e-05	-1.13613	-1.74	-0.67	7.02e-12	-1.38131	-1.71	-1.12
Repetition 2	Repetition 3	1	-0.195403	-0.71	0.27	0.000858	-0.449251	-1.12	0.1	0.031	-0.305195	-0.68	0.03
Repetition 2	Repetition 4	4.25e-06	-1.23693	-1.65	-0.91	3.56e-05	-1.04436	-1.62	-0.56	6.06e-10	-1.14054	-1.46	-0.88
Repetition 3	Repetition 4	7.02e-06	-1.19127	-1.6	-0.94	0.000156	-0.686062	-1.25	-0.11	8.16e-09	-0.984265	-1.28	-0.73
Duration entire rep
Repetition 1	Repetition 2	0.006	-0.622306	-1.06	-0.22	0.074	-0.489447	-0.99	0.02	0.000169	-0.563853	-0.87	-0.24
Repetition 1	Repetition 3	5.5e-06	-1.14593	-1.71	-0.7	0.000377	-1.07473	-1.6	-0.6	1.2e-09	-1.09667	-1.48	-0.79
Repetition 1	Repetition 4	9.78e-08	-1.64693	-2.17	-1.33	7.62e-06	-1.93364	-2.95	-1.35	5.89e-13	-1.73457	-2.17	-1.42
Repetition 2	Repetition 3	0.007	-0.383716	-0.92	0.12	0.002	-0.511174	-1.14	0.07	5.68e-06	-0.4394	-0.84	-0.05
Repetition 2	Repetition 4	2.9e-07	-1.26788	-1.72	-0.95	2.54e-05	-1.42649	-2.34	-0.8	5.15e-12	-1.31986	-1.69	-1.02
Repetition 3	Repetition 4	1.71e-06	-1.06038	-1.47	-0.7	4.9e-05	-0.989163	-1.74	-0.42	1.94e-10	-1.0281	-1.38	-0.72

## Sheet: Table S7
Between-set ANOVA results
	Set
Identifier	p-value
Hip beg. first pull			Red text	p < 0.05
Repetition 1	0.011
Repetition 2	0.114
Repetition 3	0.478
Repetition 4	0.202
Mean of reps	0.000821
Hip beg. lap
Repetition 1	0.109
Repetition 2	0.067
Repetition 3	0.344
Repetition 4	0.262
Mean of reps	0.000857
Hip beg. second pull
Repetition 1	0.017
Repetition 2	0.217
Repetition 3	0.521
Repetition 4	0.284
Mean of reps	0.002
Hip lift completion
Repetition 1	0.693
Repetition 2	0.336
Repetition 3	0.937
Repetition 4	0.93
Mean of reps	0.781
Hip ROM first pull
Repetition 1	0.96
Repetition 2	0.716
Repetition 3	0.42
Repetition 4	0.344
Mean of reps	0.589
Hip ROM lap
Repetition 1	0.388
Repetition 2	0.669
Repetition 3	0.096
Repetition 4	0.361
Mean of reps	0.115
Hip ROM second pull
Repetition 1	0.171
Repetition 2	0.668
Repetition 3	0.213
Repetition 4	0.234
Mean of reps	0.058
Knee beg. first pull
Repetition 1	0.579
Repetition 2	0.748
Repetition 3	0.258
Repetition 4	0.755
Mean of reps	0.326
Knee beg. lap
Repetition 1	0.54
Repetition 2	0.39
Repetition 3	0.489
Repetition 4	0.08
Mean of reps	0.378
Knee beg. second pull
Repetition 1	0.479
Repetition 2	0.8
Repetition 3	0.254
Repetition 4	0.58
Mean of reps	0.338
Knee lift completion
Repetition 1	0.122
Repetition 2	0.154
Repetition 3	0.525
Repetition 4	0.08
Mean of reps	0.115
Knee ROM first pull
Repetition 1	0.61
Repetition 2	0.572
Repetition 3	0.354
Repetition 4	0.325
Mean of reps	0.73
Knee ROM lap
Repetition 1	0.948
Repetition 2	0.875
Repetition 3	0.129
Repetition 4	0.676
Mean of reps	0.363
Knee ROM second pull
Repetition 1	0.637
Repetition 2	0.704
Repetition 3	0.445
Repetition 4	0.586
Mean of reps	0.685
Ankle beg. first pull
Repetition 1	0.525
Repetition 2	0.748
Repetition 3	0.034
Repetition 4	0.642
Mean of reps	0.094
Ankle beg. lap
Repetition 1	0.933
Repetition 2	0.558
Repetition 3	0.431
Repetition 4	0.77
Mean of reps	0.766
Ankle beg. second pull
Repetition 1	0.055
Repetition 2	0.35
Repetition 3	0.532
Repetition 4	0.412
Mean of reps	0.025
Ankle lift completion
Repetition 1	0.265
Repetition 2	0.608
Repetition 3	0.339
Repetition 4	0.762
Mean of reps	0.829
Ankle ROM first pull
Repetition 1	0.671
Repetition 2	0.225
Repetition 3	0.551
Repetition 4	0.786
Mean of reps	0.368
Ankle ROM lap
Repetition 1	0.775
Repetition 2	0.569
Repetition 3	0.251
Repetition 4	0.39
Mean of reps	0.139
Ankle ROM second pull
Repetition 1	0.426
Repetition 2	0.549
Repetition 3	1
Repetition 4	0.638
Mean of reps	0.658
Recovery duration
Repetition 1	0.811
Repetition 2	0.257
Repetition 3	0.165
Repetition 4	0.871
Mean of reps	0.232
Initial grip duration
Repetition 1	0.169
Repetition 2	0.755
Repetition 3	0.098
Repetition 4	0.893
Mean of reps	0.278
First pull duration
Repetition 1	0.762
Repetition 2	0.256
Repetition 3	0.875
Repetition 4	0.333
Mean of reps	0.547
Lap duration
Repetition 1	0.096
Repetition 2	0.146
Repetition 3	0.896
Repetition 4	0.526
Mean of reps	0.095
Second pull duration
Repetition 1	0.471
Repetition 2	0.58
Repetition 3	0.206
Repetition 4	0.3
Mean of reps	0.036
Entire repetition duration
Repetition 1	0.384
Repetition 2	0.354
Repetition 3	0.128
Repetition 4	0.842
Mean of reps	0.285

## Sheet: Table S8
Between-set pairwise comparisons
		Mean
		Male				Female				Group
		p-value	Cohen's d	CI low	CI high	p-value	Cohen's d	CI low	CI high	p-value	Cohen's d	CI low	CI high
Hip beg. first pull
Set 1	Set 2	0.072	0.218995	-0.19	0.69	0.042	0.261219	-0.25	0.81	0.002	0.260384	-0.08	0.58			Large effect size (> 0.8)
Set 1	Set 3	0.546	-0.0028334	-0.44	0.45	0.006	0.392882	-0.1	0.95	0.006	0.221543	-0.11	0.55			Medium effect size (0.5 > es ≥ 0.8)
Set 2	Set 3	0.438	-0.200507	-0.61	0.22	0.549	0.174529	-0.39	0.65	1	-0.0396585	-0.35	0.29			Small effect size (0.2 > es ≥ 0.5)
Hip beg. lap																Negligible effect size (≤ 0.2)
Set 1	Set 2	0.000927	0.304988	-0.13	0.81	0.36	0.132081	-0.35	0.67	0.00069	0.244845	-0.07	0.62		Red text	p < 0.05
Set 1	Set 3	0.104	0.106285	-0.33	0.55	0.059	0.255578	-0.28	0.74	0.005	0.204927	-0.12	0.53
Set 2	Set 3	0.309	-0.192013	-0.62	0.22	0.257	0.132125	-0.38	0.67	1	-0.0549034	-0.4	0.26
Hip beg. second pull
Set 1	Set 2	0.137	-0.0822969	-0.52	0.38	0.123	0.151546	-0.38	0.7	0.013	0.0462709	-0.28	0.38
Set 1	Set 3	0.888	-0.0959017	-0.56	0.36	0.003	0.400082	-0.07	0.95	0.006	0.158066	-0.18	0.49
Set 2	Set 3	1	-0.00676943	-0.43	0.45	0.088	0.262296	-0.27	0.82	0.525	0.105468	-0.21	0.43
Hip lift completion
Set 1	Set 2	0.405	0.264732	-0.16	0.73	1	-0.0528751	-0.56	0.47	1	0.124823	-0.2	0.49
Set 1	Set 3	1	0.177155	-0.28	0.67	1	-0.102969	-0.62	0.39	1	0.0612162	-0.28	0.41
Set 2	Set 3	1	-0.0980258	-0.54	0.31	1	-0.0484014	-0.6	0.45	1	-0.0652042	-0.39	0.25
Hip ROM first pull
Set 1	Set 2	1	-0.183237	-0.64	0.29	0.084	0.233831	-0.27	0.73	0.765	0.0436615	-0.3	0.35
Set 1	Set 3	1	-0.346784	-0.8	0.12	0.969	0.167874	-0.4	0.65	1	-0.0550013	-0.39	0.29
Set 2	Set 3	0.693	-0.172506	-0.62	0.28	1	-0.0293461	-0.61	0.48	0.924	-0.102363	-0.45	0.23
Hip ROM lap
Set 1	Set 2	1	-0.447703	-0.89	-0.02	1	0.11161	-0.38	0.63	1	-0.233198	-0.55	0.1
Set 1	Set 3	0.246	-0.410878	-0.88	0.04	1	-0.0773217	-0.61	0.44	0.267	-0.262951	-0.61	0.08
Set 2	Set 3	1	0.0867192	-0.42	0.52	0.324	-0.179993	-0.65	0.35	1	-0.0181355	-0.36	0.3
Hip ROM second pull
Set 1	Set 2	1	-0.272053	-0.7	0.19	1	0.00113919	-0.53	0.51	1	-0.098841	-0.43	0.23
Set 1	Set 3	1	-0.106882	-0.56	0.36	0.063	0.184229	-0.33	0.68	0.181	0.0667865	-0.3	0.39
Set 2	Set 3	0.366	0.159183	-0.26	0.6	0.074	0.194921	-0.3	0.71	0.024	0.1754	-0.16	0.48
Knee beg. first pull
Set 1	Set 2	0.009	-0.446409	-0.87	-0.06	0.001	0.417339	-0.07	1.02	1	-0.0859262	-0.41	0.24
Set 1	Set 3	0.002	-0.573318	-0.98	-0.17	0.062	0.276732	-0.22	0.83	0.196	-0.204574	-0.53	0.09
Set 2	Set 3	0.579	-0.0984189	-0.54	0.3	0.666	-0.159834	-0.71	0.35	0.223	-0.120942	-0.47	0.19
Knee beg. lap
Set 1	Set 2	0.149	0.226974	-0.16	0.64	1	-0.133704	-0.66	0.37	0.612	0.104321	-0.21	0.45
Set 1	Set 3	0.038	0.31421	-0.11	0.73	1	-0.158228	-0.67	0.36	0.309	0.151027	-0.15	0.49
Set 2	Set 3	0.84	0.0827917	-0.33	0.5	1	-0.0345602	-0.53	0.49	1	0.0477116	-0.28	0.37
Knee beg. second pull
Set 1	Set 2	0.447	-0.156049	-0.58	0.27	0.669	0.112239	-0.38	0.63	1	-0.0738582	-0.39	0.24
Set 1	Set 3	0.252	-0.19251	-0.6	0.23	1	-0.00454615	-0.54	0.55	0.342	-0.127818	-0.45	0.18
Set 2	Set 3	1	-0.0333206	-0.41	0.35	0.639	-0.0979566	-0.58	0.42	0.726	-0.054023	-0.37	0.27
Knee lift completion
Set 1	Set 2	1	-0.0114524	-0.39	0.4	1	0.0396545	-0.47	0.54	1	0.00754217	-0.3	0.35
Set 1	Set 3	1	-0.0389753	-0.44	0.35	0.205	-0.382782	-0.96	0.11	0.251	-0.177299	-0.47	0.14
Set 2	Set 3	1	-0.0249556	-0.46	0.35	0.017	-0.437746	-1	0.08	0.582	-0.178745	-0.5	0.13
Knee ROM first pull
Set 1	Set 2	1	-0.109549	-0.53	0.31	1	0.0156181	-0.47	0.52	1	-0.0679534	-0.4	0.24
Set 1	Set 3	0.702	-0.148358	-0.57	0.26	0.714	0.186974	-0.3	0.69	1	-0.0344987	-0.34	0.27
Set 2	Set 3	1	-0.0414197	-0.43	0.37	0.459	0.163728	-0.31	0.73	1	0.0344476	-0.26	0.34
Knee ROM lap
Set 1	Set 2	1	-0.126882	-0.57	0.26	0.098	0.338771	-0.17	0.89	1	0.0622144	-0.26	0.38
Set 1	Set 3	0.099	-0.287504	-0.73	0.13	0.462	0.222865	-0.27	0.81	1	-0.0689387	-0.39	0.26
Set 2	Set 3	0.375	-0.160878	-0.58	0.19	1	-0.0802781	-0.62	0.42	0.262	-0.126033	-0.48	0.21
Knee ROM second pull
Set 1	Set 2	0.186	-0.187312	-0.58	0.25	0.266	0.200752	-0.33	0.73	1	-0.0641849	-0.4	0.25
Set 1	Set 3	1	-0.117103	-0.55	0.3	0.029	0.248371	-0.26	0.76	1	-0.00551801	-0.31	0.29
Set 2	Set 3	1	0.0668127	-0.35	0.45	1	0.048651	-0.43	0.55	0.963	0.0579254	-0.23	0.36
Ankle beg. first pull
Set 1	Set 2	0.236	-0.137881	-0.53	0.27	1	0.155673	-0.37	0.69	1	-0.0067613	-0.3	0.3
Set 1	Set 3	0.006	-0.578852	-0.95	-0.19	1	0.0239969	-0.49	0.55	0.176	-0.261579	-0.59	0.04
Set 2	Set 3	0.031	-0.41227	-0.79	-0.04	1	-0.151216	-0.71	0.39	0.03	-0.263063	-0.55	0.04
Ankle beg. lap
Set 1	Set 2	1	0.168126	-0.27	0.61	1	-0.16908	-0.71	0.36	1	0.0204536	-0.31	0.35
Set 1	Set 3	1	0.187362	-0.24	0.61	0.642	-0.207165	-0.75	0.29	1	0.0133465	-0.31	0.36
Set 2	Set 3	1	0	-0.41	0.39	1	-0.0189783	-0.58	0.52	1	-0.00825747	-0.35	0.31
Ankle beg. second pull
Set 1	Set 2	1	0.0600875	-0.33	0.47	0.217	-0.329631	-0.81	0.19	0.262	-0.0997932	-0.41	0.22
Set 1	Set 3	0.522	-0.0740048	-0.51	0.36	0.178	-0.335885	-0.81	0.15	0.066	-0.185849	-0.52	0.16
Set 2	Set 3	0.474	-0.126511	-0.56	0.28	1	-0.0158796	-0.57	0.51	0.597	-0.0888264	-0.4	0.23
Ankle lift completion
Set 1	Set 2	1	0.0264833	-0.37	0.45	1	0.0955299	-0.4	0.58	1	0.0330835	-0.31	0.34
Set 1	Set 3	1	0.0854524	-0.35	0.5	1	-0.179138	-0.69	0.31	1	-0.0217365	-0.36	0.27
Set 2	Set 3	1	0.0582133	-0.34	0.46	0.621	-0.279627	-0.81	0.25	1	-0.0569317	-0.38	0.27
Ankle ROM first pull
Set 1	Set 2	0.444	-0.228504	-0.63	0.17	1	-0.0315551	-0.51	0.49	0.768	-0.165574	-0.48	0.16
Set 1	Set 3	0.253	-0.305269	-0.68	0.11	1	-0.0818143	-0.44	0.65	0.489	-0.211823	-0.51	0.11
Set 2	Set 3	1	-0.080569	-0.54	0.3	1	-0.0586497	-0.44	0.56	1	-0.0705373	-0.35	0.25
Ankle ROM lap
Set 1	Set 2	1	0.0457069	-0.42	0.46	0.066	0.442633	-0.07	0.98	0.393	0.190216	-0.13	0.51
Set 1	Set 3	1	0.0373974	-0.41	0.45	0.196	0.306835	-0.17	0.9	0.633	0.134793	-0.19	0.46
Set 2	Set 3	1	-0.00551807	-0.38	0.41	1	-0.115381	-0.62	0.44	1	-0.0461242	-0.36	0.27
Ankle ROM second pull
Set 1	Set 2	1	0.0229099	-0.35	0.47	1	-0.118798	-0.67	0.35	1	-0.0205012	-0.32	0.33
Set 1	Set 3	1	0.104614	-0.31	0.58	1	0.0571844	-0.5	0.56	1	0.0939243	-0.23	0.41
Set 2	Set 3	1	0.0776064	-0.31	0.49	0.993	0.174893	-0.35	0.71	0.906	0.109221	-0.19	0.43
Recovery duration
Set 1	Set 2	1	-0.103408	-0.57	0.27	1	0.0524971	-0.42	0.6	1	-0.0490963	-0.38	0.24
Set 1	Set 3	1	0.0153706	-0.48	0.4	0.08	-0.248187	-0.75	0.28	0.96	-0.0828742	-0.43	0.22
Set 2	Set 3	0.645	0.138739	-0.27	0.52	0.009	-0.275998	-0.87	0.23	1	-0.0336671	-0.37	0.28
Initial grip duration
Set 1	Set 2	0.726	0.102057	-0.3	0.5	1	-0.104491	-0.61	0.44	1	0.00510518	-0.31	0.32
Set 1	Set 3	1	-0.12637	-0.47	0.34	0.103	-0.207085	-0.84	0.29	0.489	-0.155274	-0.45	0.17
Set 2	Set 3	0.363	-0.210969	-0.56	0.23	1	-0.0671199	-0.72	0.4	0.354	-0.153808	-0.45	0.14
First pull duration
Set 1	Set 2	0.053	0.171336	-0.27	0.57	1	-0.0562767	-0.56	0.48	0.238	0.0945017	-0.24	0.41
Set 1	Set 3	0.181	0.189084	-0.23	0.6	1	-0.177638	-0.59	0.39	1	0.0419273	-0.28	0.36
Set 2	Set 3	1	0.0162414	-0.42	0.44	1	-0.130658	-0.53	0.43	1	-0.0466482	-0.34	0.29
Lap duration
Set 1	Set 2	0.714	0.119937	-0.32	0.49	0.399	0.202504	-0.26	0.7	0.225	0.148485	-0.16	0.41
Set 1	Set 3	0.69	0.116842	-0.29	0.52	0.657	0.219774	-0.27	0.72	0.259	0.151819	-0.19	0.44
Set 2	Set 3	1	-0.00613178	-0.43	0.38	1	0.0104601	-0.54	0.49	1	-0.00059746	-0.33	0.32
Second pull duration
Set 1	Set 2	0.87	0.0539096	-0.35	0.48	1	0.0862962	-0.46	0.61	0.573	0.0637241	-0.24	0.39
Set 1	Set 3	0.076	0.194761	-0.23	0.61	0.227	0.198813	-0.36	0.67	0.012	0.190952	-0.13	0.51
Set 2	Set 3	0.516	0.135535	-0.24	0.55	1	0.0994249	-0.49	0.57	0.366	0.12048	-0.18	0.44
Entire rep duration
Set 1	Set 2	0.45	0.0443319	-0.39	0.42	1	0.0360378	-0.49	0.55	0.435	0.0415492	-0.29	0.38
Set 1	Set 3	0.813	0.0375582	-0.37	0.43	0.693	-0.102419	-0.64	0.43	1	-0.0123997	-0.33	0.29
Set 2	Set 3	1	-0.00536366	-0.4	0.41	0.333	-0.135077	-0.66	0.34	1	-0.0551123	-0.38	0.28

## Sheet: Table S9
Between-set general data
	Mean of all repetitions
	Male			Female			Group
	Set 1	Set 2	Set 3	Set 1	Set 2	Set 3	Set 1	Set 2	Set 3
Hip
Beg. first pull	64.8 ± 14.6	61.6 ± 15.0	64.9 ± 17.6	89.0 ± 22.5	83.9 ± 15.3	81.1 ± 17.2	76.2 ± 22.2	70.8 ± 18.7	71.6 ± 19.1
Beg. lap	20.6 ± 15.0	15.8 ± 16.5	18.9 ± 16.3	33.9 ± 21.6	31.3 ± 17.5	29.2 ± 14.9	26.9 ± 19.5	22.2 ± 18.5	23.2 ± 16.4
Beg. second pull	36.1 ± 18.1	37.9 ± 24.4	38.0 ± 21.9	48.3 ± 22.3	44.9 ± 21.8	38.8 ± 25.1	41.8 ± 20.9	40.8 ± 23.4	38.3 ± 23.1
Lift completion	2.8 ± 9.2	0.1 ± 11.5	1.1 ± 10.0	11.7 ± 15.9	12.5 ± 16.1	13.3 ± 15.3	7.0 ± 13.4	5.2 ± 14.8	6.1 ± 13.8
First pull ROM	52.5 ± 12.9	54.8 ± 11.7	56.8 ± 11.7	64.1 ± 13.3	61.1 ± 12.4	61.6 ± 17.1	58.0 ± 14.2	57.4 ± 12.3	58.8 ± 14.3
Lap ROM	27.7 ± 13.0	35.4 ± 20.4	33.8 ± 16.3	25.0 ± 16.0	23.3 ± 14.5	26.3 ± 19.4	26.4 ± 14.5	30.4 ± 19.0	30.7 ± 17.9
Second pull ROM	46.3 ± 15.7	50.9 ± 18.3	48.1 ± 17.6	54.3 ± 29.8	54.3 ± 26.7	49.3 ± 24.2	50.1 ± 23.6	52.3 ± 22.1	48.6 ± 20.4
Knee
Beg. first pull	42.4 ± 13.3	48.1 ± 12.1	49.2 ± 10.1	47.2 ± 14.8	41.4 ± 12.9	43.5 ± 12.4	44.3 ± 14.1	45.5 ± 12.7	46.9 ± 11.3
Beg. lap	52.3 ± 17.6	48.0 ± 19.9	46.4 ± 20.0	38.1 ± 14.4	39.8 ± 11.4	40.2 ± 12.8	46.6 ± 17.8	44.8 ± 17.5	44.0 ± 17.7
Beg. second pull	70.5 ± 21.8	74.0 ± 23.0	74.7 ± 22.4	65.8 ± 14.6	64.1 ± 15.5	65.9 ± 20.4	68.6 ± 19.3	70.1 ± 20.9	71.2 ± 21.9
Lift completion	7.7 ± 9.3	7.8 ± 11.0	8.1 ± 10.2	7.9 ± 9.7	7.5 ± 8.7	11.8 ± 10.8	7.8 ± 9.4	7.7 ± 10.1	9.6 ± 10.6
First pull ROM	37.8 ± 19.1	39.7 ± 16.2	40.4 ± 15.9	38.7 ± 12.7	38.5 ± 14.1	36.1 ± 15.0	38.1 ± 16.7	39.2 ± 15.3	38.7 ± 15.6
Lap ROM	33.6 ± 16.4	35.7 ± 17.1	38.6 ± 17.9	36.1 ± 17.9	30.1 ± 17.3	31.6 ± 21.4	34.6 ± 16.9	33.5 ± 17.3	35.8 ± 19.6
Second pull ROM	66.9 ± 22.8	71.0 ± 20.6	69.6 ± 22.3	61.5 ± 15.5	58.4 ± 15.5	57.7 ± 15.7	64.8 ± 20.3	66.1 ± 19.7	64.9 ± 20.7
Ankle
Beg. first pull	4.6 ± 5.5	5.4 ± 6.2	7.8 ± 5.7	0.8 ± 9.9	-0.6 ± 7.7	0.6 ± 7.7	3.0 ± 7.8	3.0 ± 7.4	5.0 ± 7.4
Beg. lap	-2.5 ± 7.8	-3.9 ± 9.1	-3.9 ± 7.4	-5.1 ± 7.8	-3.6 ± 10.6	-3.4 ± 9.1	-3.6 ± 7.8	-3.8 ± 9.6	-3.7 ± 8.1
Beg. second pull	12.1 ± 9.7	11.5 ± 11.2	12.9 ± 10.7	5.3 ± 11.1	8.4 ± 7.9	8.6 ± 8.4	9.3 ± 10.8	10.3 ± 10.1	11.2 ± 10.0
Lift completion	-7.1 ± 20.9	-7.6 ± 20.2	-8.7 ± 17.2	-15.6 ± 15.0	-16.9 ± 11.8	-12.6 ± 18.0	-10.6 ± 19.0	-11.2 ± 17.9	-10.2 ± 17.5
First pull ROM	15.8 ± 7.4	17.5 ± 7.5	18.1 ± 7.9	15.2 ± 4.8	15.4 ± 6.4	15.9 ± 11.6	15.5 ± 6.4	16.7 ± 7.1	17.2 ± 9.5
Lap ROM	19.5 ± 10.9	19.0 ± 9.4	19.1 ± 10.9	18.9 ± 9.6	14.8 ± 8.9	15.9 ± 10.0	19.3 ± 10.3	17.4 ± 9.4	17.8 ± 10.6
Second pull ROM	34.0 ± 12.2	33.7 ± 13.8	32.6 ± 14.4	37.1 ± 11.2	38.4 ± 11.1	36.5 ± 11.4	35.3 ± 11.8	35.6 ± 12.9	34.1 ± 13.3
Duration
Recovery	1.682 ± 1.859	1.860 ± 1.572	1.657 ± 1.346	1.703 ± 1.287	1.629 ± 1.552	2.074 ± 1.670	1.691 ± 1.647	1.769 ± 1.558	1.821 ± 1.485
Initial grip	1.320 ± 1.180	1.209 ± 0.974	1.509 ± 1.754	1.633 ± 1.315	1.796 ± 1.779	1.900 ± 1.264	1.442 ± 1.235	1.435 ± 1.362	1.662 ± 1.583
First pull	1.089 ± 0.407	1.024 ± 0.349	1.018 ± 0.336	1.015 ± 0.273	1.031 ± 0.307	1.083 ± 0.468	1.059 ± 0.359	1.027 ± 0.331	1.044 ± 0.391
Lap	1.450 ± 1.367	1.298 ± 1.153	1.305 ± 1.096	1.427 ± 1.130	1.219 ± 0.916	1.210 ± 0.824	1.441 ± 1.270	1.267 ± 1.060	1.268 ± 0.994
Second pull	1.699 ± 0.562	1.668 ± 0.586	1.592 ± 0.539	1.477 ± 0.576	1.428 ± 0.560	1.381 ± 0.369	1.611 ± 0.575	1.574 ± 0.584	1.509 ± 0.488
Entire repetition	7.240 ± 4.298	7.060 ± 3.803	7.082 ± 4.144	7.275 ± 3.716	7.136 ± 4.016	7.646 ± 3.526	7.254 ± 4.056	7.089 ± 3.861	7.303 ± 3.900

## Sheet: Table S10
Reliability metrics
	Stone 1				Stone 2				Stone 3				Stone 4
	Lower CI	Upper CI	ICC	SEM	Lower CI	Upper CI	ICC	SEM	Lower CI	Upper CI	ICC	SEM	Lower CI	Upper CI	ICC	SEM
Hip
Beg. first pull	0.949472	0.990698	0.976986	2.91197	0.825267	0.967833	0.920413	5.41753	0.782465	0.964336	0.905713	5.62924	0.743718	0.963598	0.895459	7.38841		CI - Confidence interval
Beg. lap	0.91118	0.983649	0.959544	3.53676	0.870408	0.976143	0.940974	4.08637	0.807628	0.968461	0.916619	4.93614	0.866566	0.981047	0.94557	4.88459		ICC - intra-class correlation coefficient
Beg. second pull	0.777432	0.959027	0.898625	6.7054	0.895019	0.980674	0.952184	5.0621	0.830647	0.972235	0.926597	5.97342	0.842542	0.977635	0.935771	6.20254		ROM - Range of motion
Lift completion	0.757346	0.955329	0.889476	3.97033	0.799036	0.963004	0.908465	4.05435	0.797682	0.96683	0.912309	4.34543	0.701208	0.95756	0.878118	5.25688		SEM - Standard error of measurement
First pull ROM	0.830781	0.968848	0.922924	3.52887	0.7639	0.956535	0.892461	4.05819	0.335059	0.890984	0.711792	5.79509	0.554472	0.936718	0.818263	6.98395
Lap ROM	0.841975	0.970909	0.928023	3.35808	0.75705	0.955274	0.889342	5.28109	0.737729	0.957001	0.886323	5.70957	0.498203	0.928725	0.79531	8.59026
Second pull ROM	0.887272	0.979247	0.948655	5.16188	0.903644	0.982261	0.956112	4.54163	0.771907	0.962605	0.901137	6.20573	0.784388	0.969375	0.912049	6.86397
Knee
Beg. first pull	0.670699	0.933259	0.843646	5.01063	0.697862	0.938764	0.856543	4.86584	0.476813	0.893963	0.751588	6.07737	0.545835	0.916391	0.793138	5.31133
Beg. lap	0.646953	0.928446	0.832371	7.31953	0.649266	0.928915	0.83347	7.74008	0.70526	0.940263	0.860056	5.82473	0.782006	0.959869	0.900708	4.92719
Beg. second pull	0.897745	0.979275	0.951449	4.67873	0.880951	0.975872	0.943475	5.35236	0.880224	0.975724	0.94313	4.42337	0.845963	0.971643	0.92984	5.46766
Lift completion	0.339775	0.866188	0.686521	4.48437	0.307158	0.859578	0.671035	5.80596	0.0543904	0.808348	0.551019	8.07929	0.424135	0.893987	0.737706	4.84832
First pull ROM	0.759599	0.951277	0.885856	5.7509	0.854278	0.970466	0.93081	4.15804	0.704689	0.940148	0.859785	5.06331	0.799278	0.963048	0.908575	5.06239
Lap ROM	0.789538	0.957345	0.900072	6.30981	0.636242	0.926275	0.827285	7.97132	0.700539	0.939307	0.857814	6.21869	0.538399	0.915022	0.78975	7.14567
Second pull ROM	0.868205	0.973288	0.937423	5.16176	0.858966	0.971416	0.933036	5.53988	0.848169	0.969228	0.92791	5.03149	0.821882	0.967209	0.918871	5.70574
Ankle
Beg. first pull	0.660691	0.93432	0.842071	2.50279	0.204072	0.845933	0.62954	5.1588	0.644767	0.931238	0.834659	3.45877	0.233514	0.866456	0.659038	3.94592
Beg. lap	0.501124	0.903433	0.767801	3.05741	0.275867	0.859831	0.662957	5.06802	0.514321	0.905988	0.773943	4.38494	0.403799	0.896125	0.734787	4.81393
Beg. second pull	0.658354	0.933868	0.840983	3.69132	0.802181	0.961708	0.907926	3.69428	0.805525	0.962356	0.909483	3.03214	0.568896	0.924889	0.808229	4.22731
Lift completion	0.47144	0.897687	0.753985	6.49469	0.0323591	0.812695	0.549617	11.6445	0.555175	0.913896	0.792959	9.40594	0.516449	0.915752	0.784899	9.27555
First pull ROM	0.467538	0.896932	0.752169	3.20203	-0.0225817	0.80206	0.524045	6.61955	0.257314	0.856239	0.654321	3.97573	0.603709	0.930955	0.823715	3.10436
Lap ROM	0.673719	0.936842	0.848134	3.0515	0.679444	0.93795	0.850799	4.26006	0.645926	0.931462	0.835198	3.36027	-0.00668148	0.824607	0.552191	7.44503
Second pull ROM	0.498322	0.902891	0.766497	5.7251	0.633719	0.929099	0.829517	4.96083	-0.15912	0.775631	0.460494	9.65485	0.470044	0.907666	0.764256	6.4971
Duration
Recovery	0.552869	0.910679	0.7897	0.227816	0.860344	0.971287	0.933032	0.297313	0.774045	0.953518	0.891609	0.364221	0.772597	0.958575	0.897149	0.752937
Initial grip	0.598339	0.916878	0.806598	0.26901	0.776065	0.954945	0.894181	0.297784	0.785621	0.956281	0.897815	0.381448	0.434546	0.903425	0.75178	1.00474
First pull	0.771533	0.953421	0.891061	0.0588917	0.175013	0.832078	0.60702	0.250182	0.739701	0.947283	0.876439	0.0883988	0.716539	0.946868	0.869253	0.143078
Lap	0.592595	0.915791	0.804056	0.245345	0.662084	0.93071	0.83837	0.286076	0.654992	0.930505	0.836824	0.303993	0.480477	0.903114	0.761182	0.729247
Second pull	0.381285	0.873203	0.703942	0.168483	0.651303	0.928861	0.833649	0.148443	0.788729	0.95652	0.898634	0.101803	0.791152	0.960851	0.903671	0.231592
Entire repetition	0.762304	0.95126	0.886219	0.405398	0.820604	0.963241	0.914168	0.741269	0.829181	0.965017	0.918325	0.756608	0.83866	0.971704	0.927879	1.37224
